# Supplementary material for: Host liver-derived extracellular vesicles deliver miR-142a-3p induces neutrophil extracellular traps via targeting WASL to block the development of Schistosoma japonicum
Source: Mol Ther. 2022 Mar 26;30(5):2092–107. doi: 10.1016/j.ymthe.2022.03.016 (PMC9092393; doi:10.1016/j.ymthe.2022.03.016)

## **Supplemental Information**

**Host liver-derived extracellular  
vesicles deliver miR-142a-3p induces neutrophil  
extracellular traps via targeting WASL to block the development of  
*Schistosoma japonicum***

**Lifu Wang, Zifeng Zhu, Yao Liao, Lichao Zhang, Zilong Yu, Ruibing Yang, Ji  
Wu, Zhongdao Wu, and Xi Sun**

1  
2  
3  
4  
5  
6  
7  
8

Supplemental Information

Host Liver-Derived Extracellular Vesicles Deliver miR-142a-3p Induces  
Neutrophil Extracellular Traps via Targeting WASL to Block the Development  
of *Schistosoma japonicum*

Lifu Wang, Zifeng Zhu, Yao Liao, Lichao Zhang, Zilong Yu, Ruibing Yang, Ji Wu,  
Zhongdao Wu, and Xi Sun

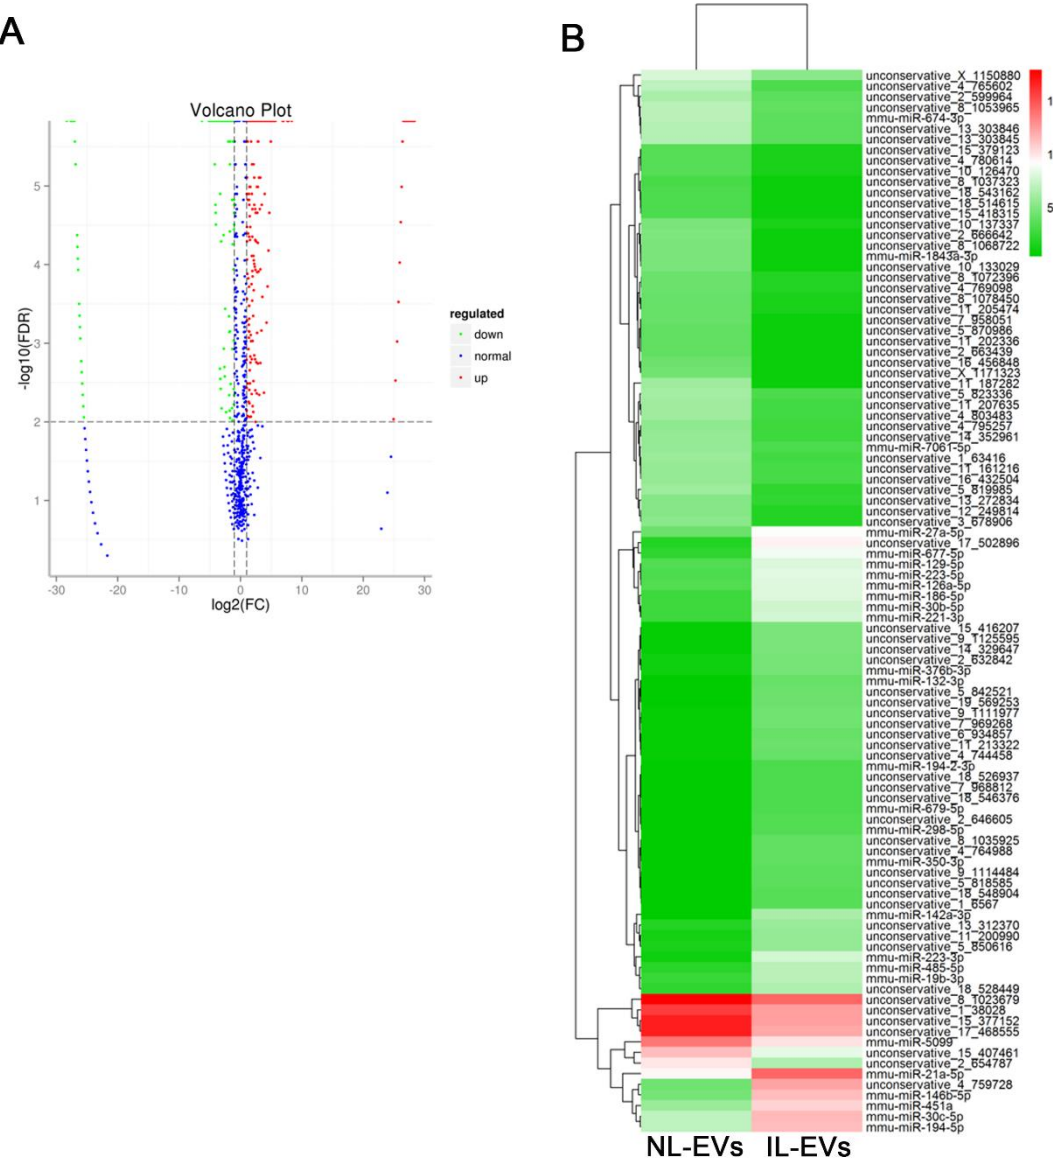

Figure S1. miRNAs of EVs derived from liver of *S. japonicum*-infected mice (IL-

9 EVs) and normal liver-derived EVs (IL-EVs) were sequenced and analyzed. (A)

10 Volcano diagrams of miRNAs derived from the comparative gene expression analyses.

11 Red dots represent up-regulated miRNAs, and green dots represent down-regulated

12 miRNAs. (B) Heat map analysis shows differentially expressed miRNAs. Bright

13 green=low expression; bright red=high expression.

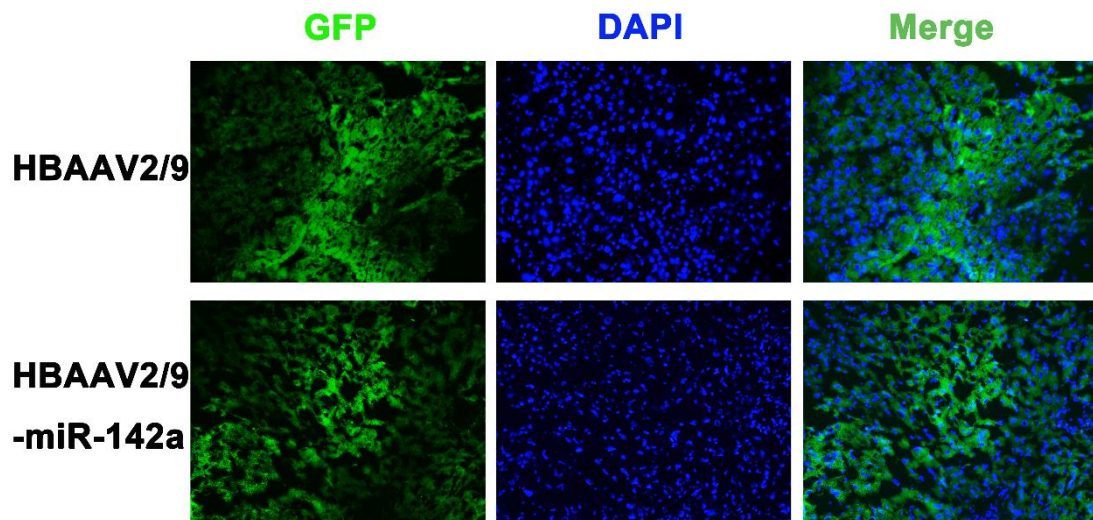

14

15 **Figure S2. HBAAV2/9-miR-142a-3p was constructed and successfully transfected**

16 **into mice (HBAAV2/9 expresses GFP). HBAAV2/9-miR-142a-3p colonization in**

17 the liver was analyzed by fluorescence microscopy.

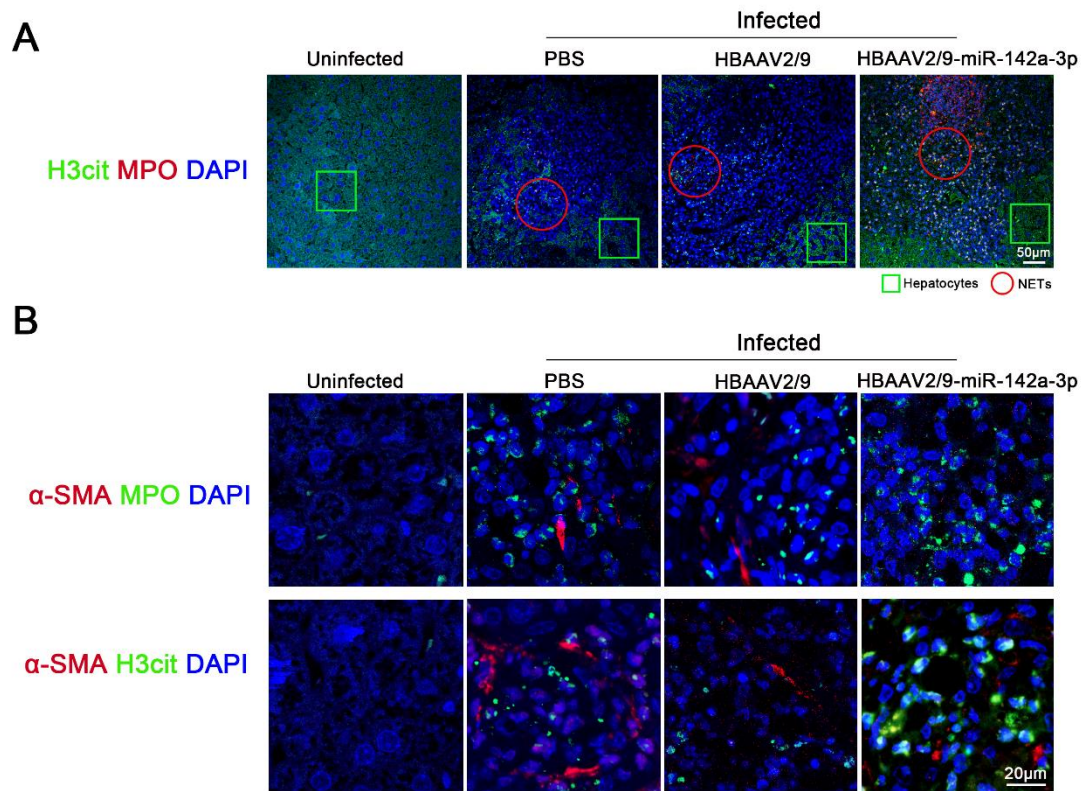

**Figure S3. NETs were observed in the granulomas of *S. japonicum*.** (A) Location of NETs in liver sections was observed based on H3cit and MPO co-localization. (B) Co-localization of H3cit, MPO, and  $\alpha$ -SMA was observed by immunofluorescence.

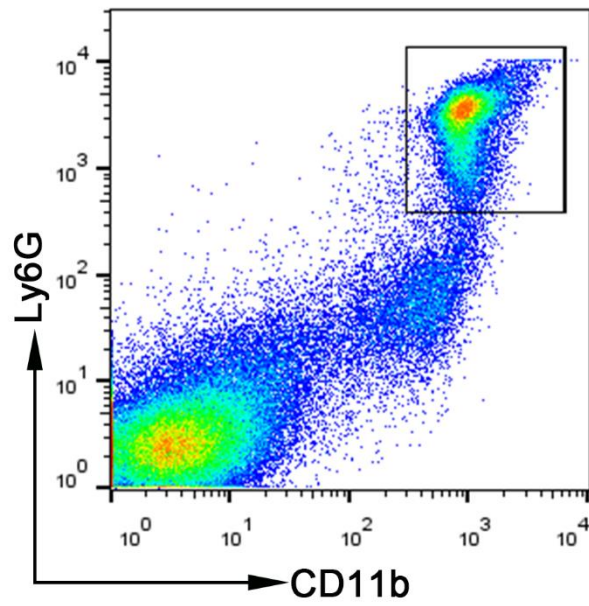

23

24 **Figure S4. Neutrophils were isolated using Percoll density gradient**

25 **centrifugation and flow cytometry.**

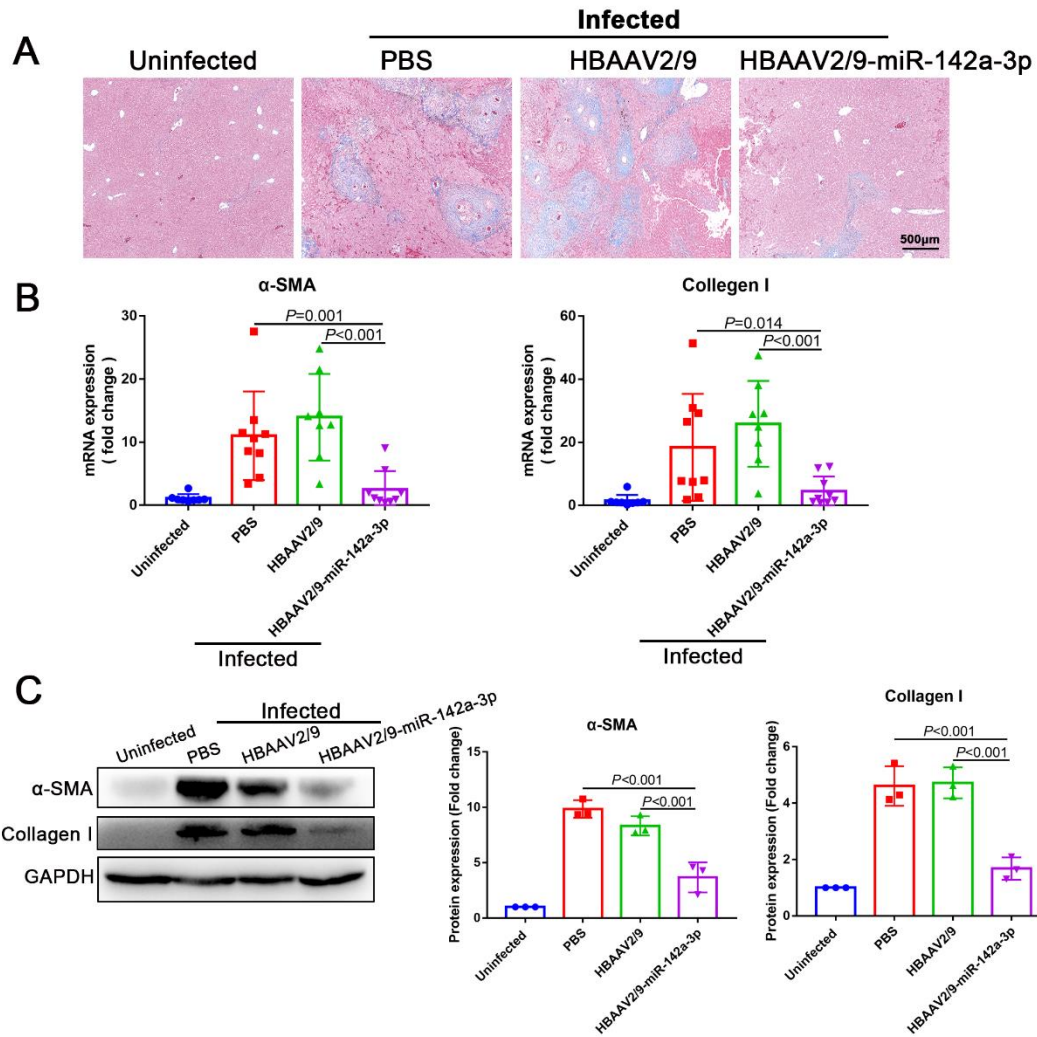

26

27 **Figure S5. miR-142a-3p attenuated liver fibrosis in *S. japonicum* infection. (A)**

28 Fibrosis was observed in liver sections stained with Masson's trichrome. **(B)**

29 Expression levels of α-SMA and collagen I in mouse liver were analyzed by qRT-PCR

30 (n=8-9 mice per group). **(C)** Expression levels of α-SMA and collagen I in mouse

31 liver were analyzed by Western blotting. Results are shown as mean ± SD (one-way

32 ANOVA with Dunnett's multiple comparison test).

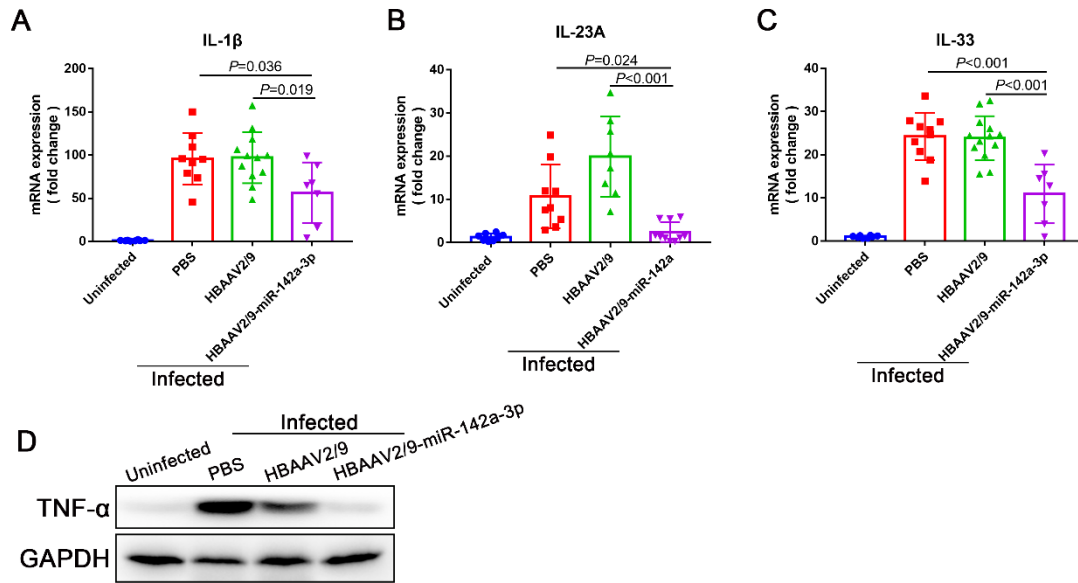

**Figure S6.** High expression of the inflammatory cytokines IL-1 $\beta$  (A), IL-23A (B), IL-33 (C), and TNF- $\alpha$  (D) in liver tissues during *S. japonicum* infection decreased significantly after HBAAV2/9-miR-142a-3p treatment (n=7-12 mice per group).

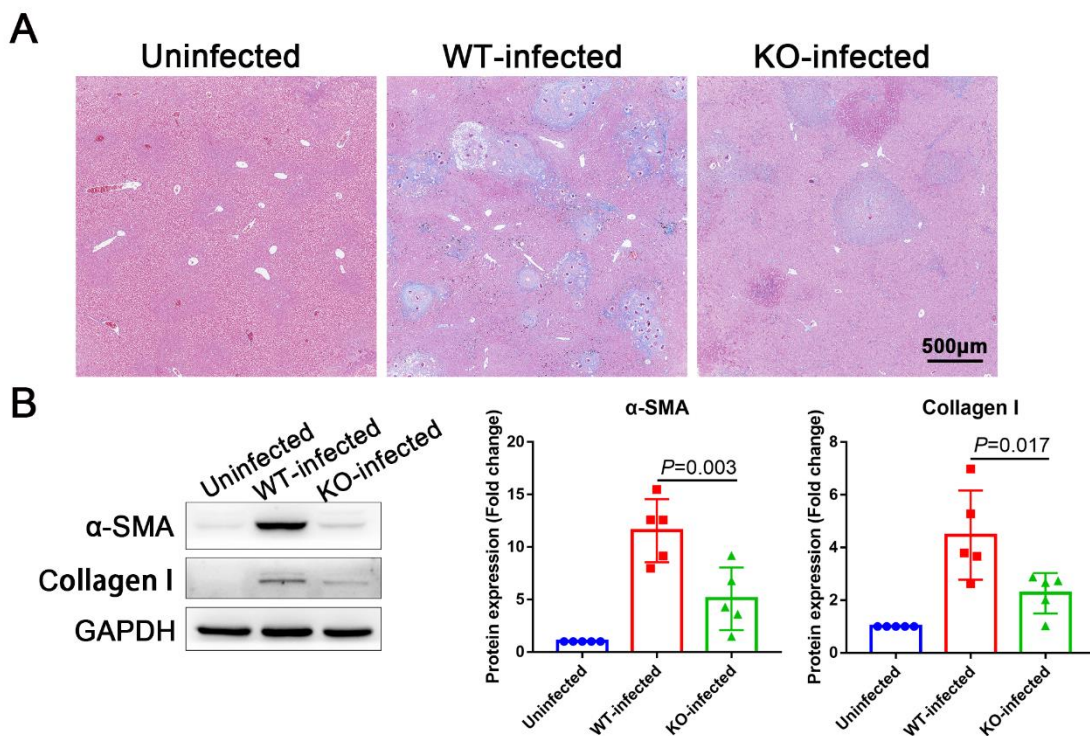

**Figure S7.** WASL-deletion attenuated liver fibrosis in *S. japonicum* infection. (A) Fibrosis was observed in liver sections stained with Masson's trichrome. (B)

Expression levels of  $\alpha$ -SMA and collagen I in mouse liver were analyzed by Western blotting. Results are shown as mean  $\pm$  SD (one-way ANOVA with Dunnett's multiple comparison test).

**Table S1. Particle characteristics and yield of NL-EVs and IL-EVs**

|                                          | NL-EVs                | IL-EVs                |
|------------------------------------------|-----------------------|-----------------------|
| Mice                                     | n=10                  | n=10                  |
| Cell culture time of liver tissues       | 24 h                  | 24 h                  |
| Cell density (cells/mL)                  | $1 \times 10^6$       | $1 \times 10^6$       |
| Particle concentration<br>(particles/mL) | $9.72 \times 10^{10}$ | $6.69 \times 10^{10}$ |
| Protein concentration (mg/mL)            | 7.34                  | 5.21                  |
| Total volume of EVs (in PBS)             | 300 $\mu$ L           | 400 $\mu$ L           |

**Table S2. The top ten differentially-expressed miRNA (IL-EVs/NL-EVs).**

| NO. | miRNA           | log2FC      | regulated |
|-----|-----------------|-------------|-----------|
| 1   | mmu-miR-142a-3p | 7.753542806 | Up        |
| 2   | mmu-miR-223-3p  | 7.615122837 | Up        |
| 3   | mmu-miR-677-5p  | 7.006138383 | Up        |
| 4   | mmu-miR-146b-5p | 6.866236731 | Up        |
| 5   | mmu-miR-186-5p  | 5.572362953 | Up        |
| 6   | mmu-miR-132-3p  | 5.49367909  | Up        |
| 7   | mmu-miR-350-3p  | 5.333210545 | Up        |

|    |                |             |    |
|----|----------------|-------------|----|
| 8  | mmu-miR-485-5p | 5.322722633 | Up |
| 9  | mmu-miR-30b-5p | 5.315091289 | Up |
| 10 | mmu-miR-221-3p | 5.176670648 | Up |

---

47

48

49

50

51

52

53

54

55

56

57

58

59

60

61

62

63

64

65

66 **WASL gene knockout mice**

67 Gene: ENSMUSG00000031165

68 Description: Wiskott-Aldrich syndrome [Source:MGI Symbol;Acc:MGI:105059]

69 Location: Chromosome X: 7,947,692-7,956,737 reverse strand.

70 Primers' sequences: "GGCCCTGGAGGACTTATTTC" and

71 "AGCTCAGGGGGTCACTGATA"

72 PCR products: WT (811 bp) and KO (~200 bp)

| PCR Reaction            |        |
|-------------------------|--------|
| 2×Taq Master Mix        | 7.5 µL |
| Forward primers (10 µM) | 0.3 µL |
| Reverse primers (10 µM) | 0.3 µL |
| Genomic DNA (20 ng/µL)  | 1.0 µL |
| Add H2O up to           | 15 µL  |

73

| PCR Program |       |        |
|-------------|-------|--------|
|             | 94 °C | 5 min  |
| 35 cycles   | 94 °C | 30 sec |
|             | 60 °C | 30 sec |
|             | 72 °C | 70 sec |
|             | 72 °C | 10 min |

74

75 **PCR products: WT (811 bp) and KO (~200 bp)**

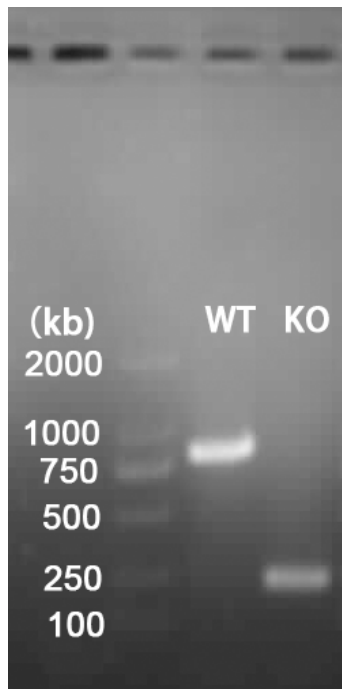

76

77

78

79

80

81

82

83

84

85

86

87

88

89

90 **Negative control for immunofluorescence**

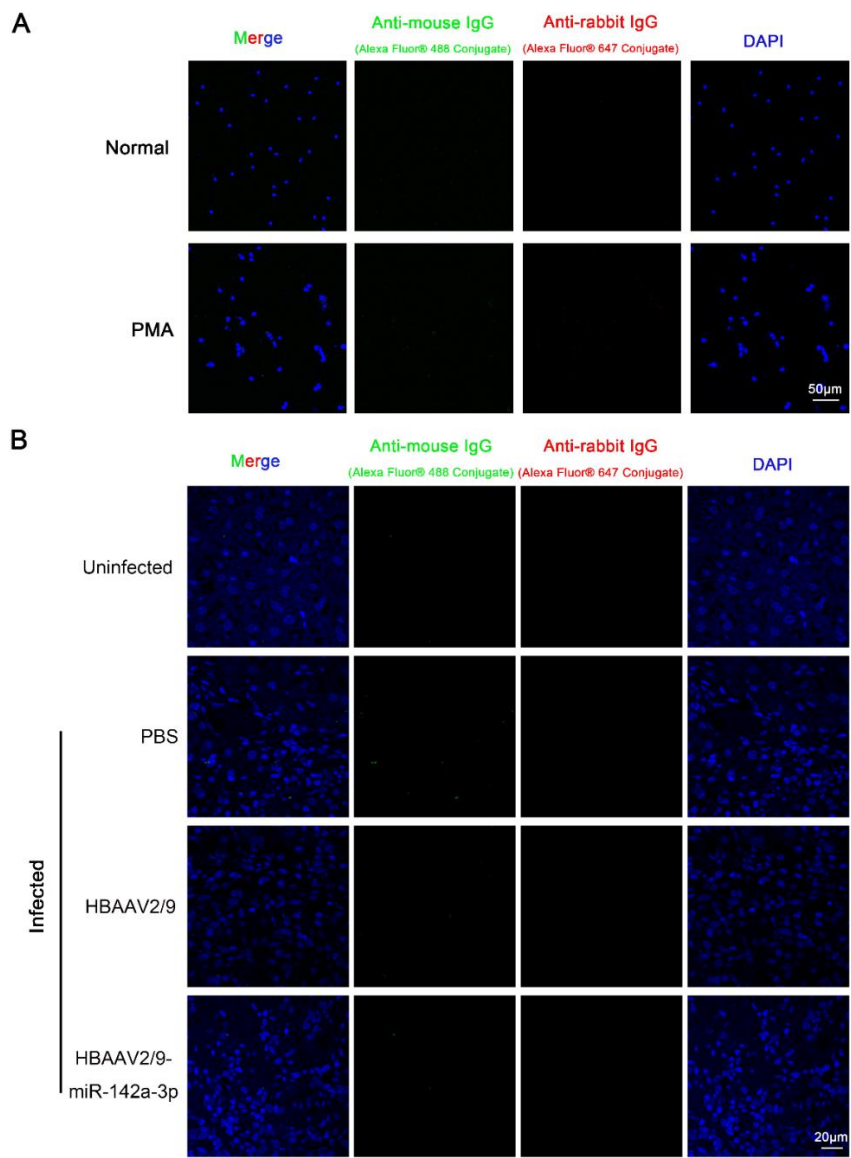

91  
92 **Negative control for immunofluorescence**

93 **Figure (A)** Neutrophils were treated with PMA (500 nM, 4 h), and the non-specific  
94 staining effect of the secondary antibody was excluded by direct use of secondary  
95 antibody without adding primary antibody. **(B)** The non-specific staining effect of the  
96 secondary antibody on liver slices was excluded by direct use of secondary antibody  
97 without adding primary antibody.

98    **Uncropped western blotting**  
99    **Figure 1B**

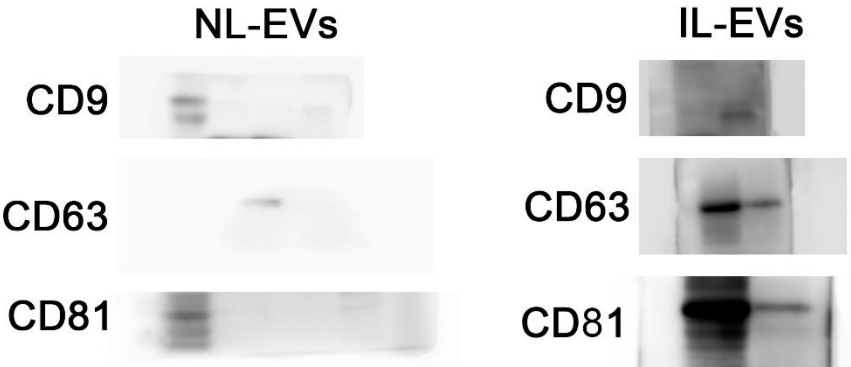

100  
101    **Figure 5C**

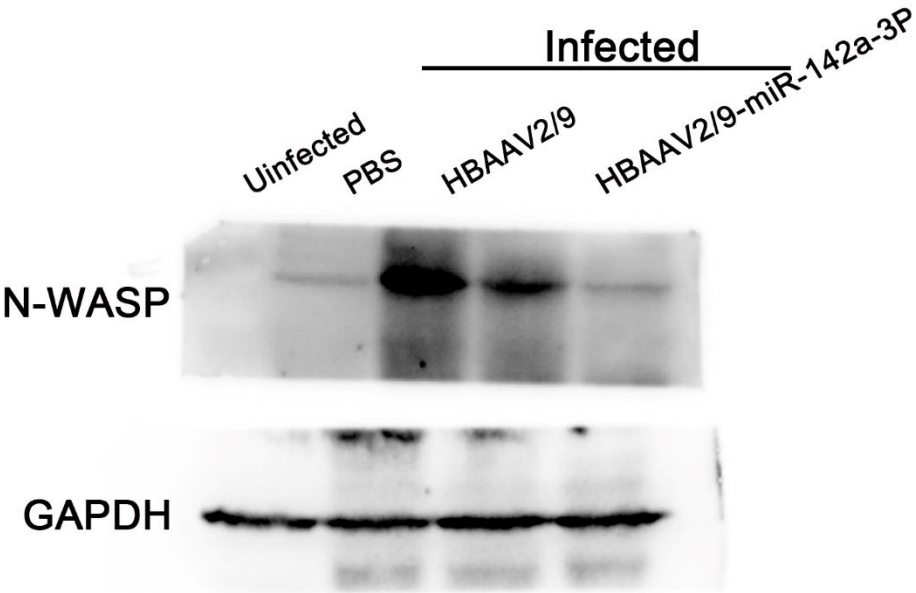

102  
103    **Figure 7B**

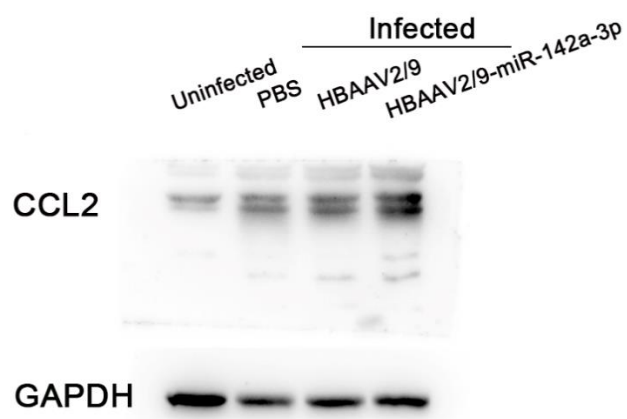

104  
105 **Figure 7D**

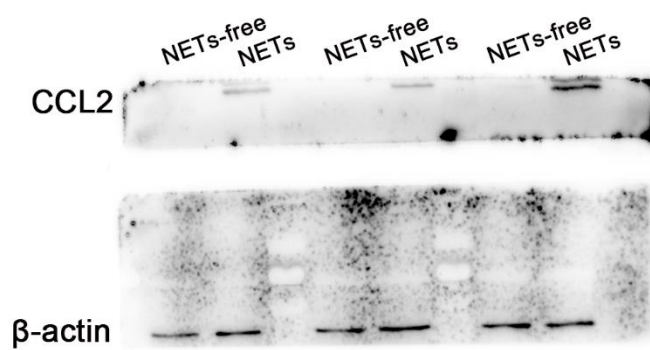

106  
107 **Figure 8E**

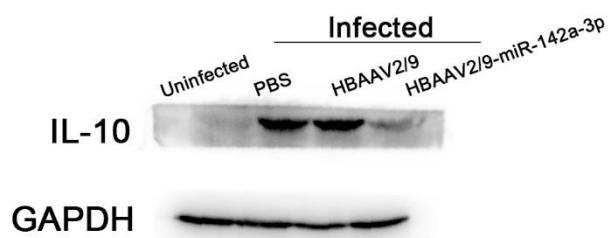

108  
109 **Figure 8K**

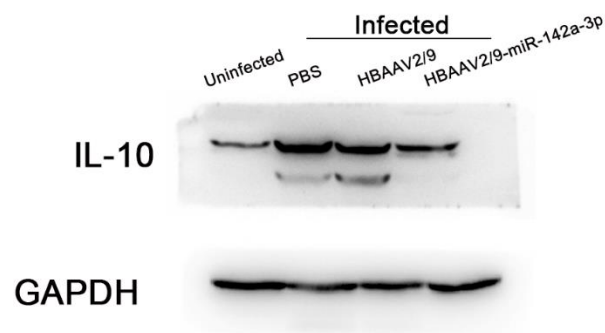

**Figure 8L**

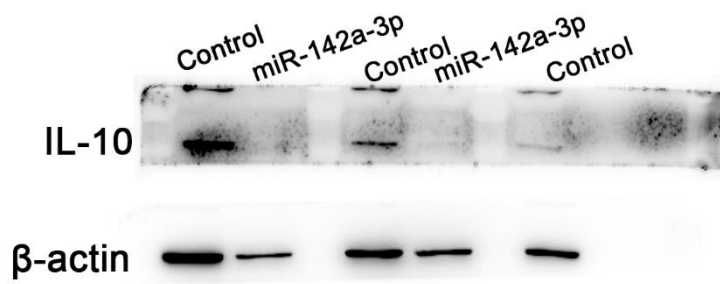

**Figure 8N**

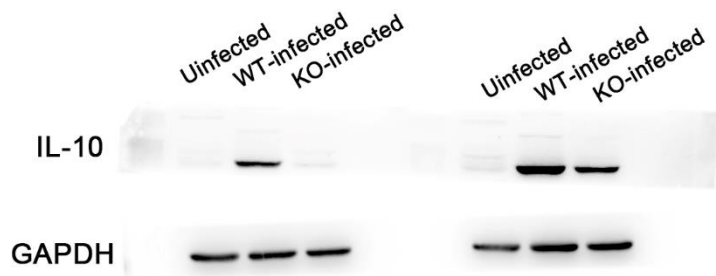

Supplement: Document S1. Figures S1–S7 and Tables S1 and S2 [file mmc1.pdf]
